# Supplementary material for: Reporter-encapsulated liposomes on graphene field effect transistors for signal enhanced detection of physiological enzymes
Source: Royal Society of Chemistry journal article supplement (doi:10.1039/c4cp04644g), 2014-12-11
Supplement: c4cp04644g1.pdf [file c4cp04644g1.pdf]

## Supplementary

|                                                  | Advantages                 | Limitations                                                |
|--------------------------------------------------|----------------------------|------------------------------------------------------------|
| <b>Enzyme-linked immunosorbent assay (ELISA)</b> | Ultra-high sensitivity     | Resource intensive; limited information on enzyme activity |
| <b>Colorimetric assay</b>                        | Naked eye detection        | Long lag time ( $\approx 20$ min)                          |
| <b>SPR-based assay</b>                           | Lag time free ( $< 2$ min) | Low sensitivity (1.82 nM)                                  |

**Table S1. A comparison of current PLA<sub>2</sub> assays.**

The commercially available sensors based on ELISA for PLA<sub>2</sub> are not ideal candidates for practical applications as ELISA is resource intensive (long assay time, expensive equipment and well-trained personnel) and can only provide limited information on the enzyme activity, in spite of its excellent sensitivity. Aili et al. (Aili et al. 2010) reported a colorimetric approach for the detection of phospholipase concentration and activity using Au nanoparticles (AuNP) and polypeptides. This approach achieves naked eye detection, while its lag time is relatively long. Another assay reported (Chen et al. 2014) involved hybrid nano-constructs as label-free optical probes for SPR-based detection of PLA<sub>2</sub>. In this approach, the specificity was excellent and the assay time was significantly reduced, but the sensitivity of this assay was relatively low (LOD = 1.82 nM).

Figure S1(a) and (b) show the  $I_d$  vs.  $V_g$  at a drain voltage of 10 mV and  $I_d$  vs.  $V_d$  at different gate voltages, respectively. The device shows typical semiconducting behavior in the range from –

600 mV to 0 mV, indicating its good functionality as a transistor. Meanwhile, the linear relation between  $I_d$  and  $V_d$  illustrated that the contact between the rGO films and the Au electrode was a good Ohmic contact.

(a)

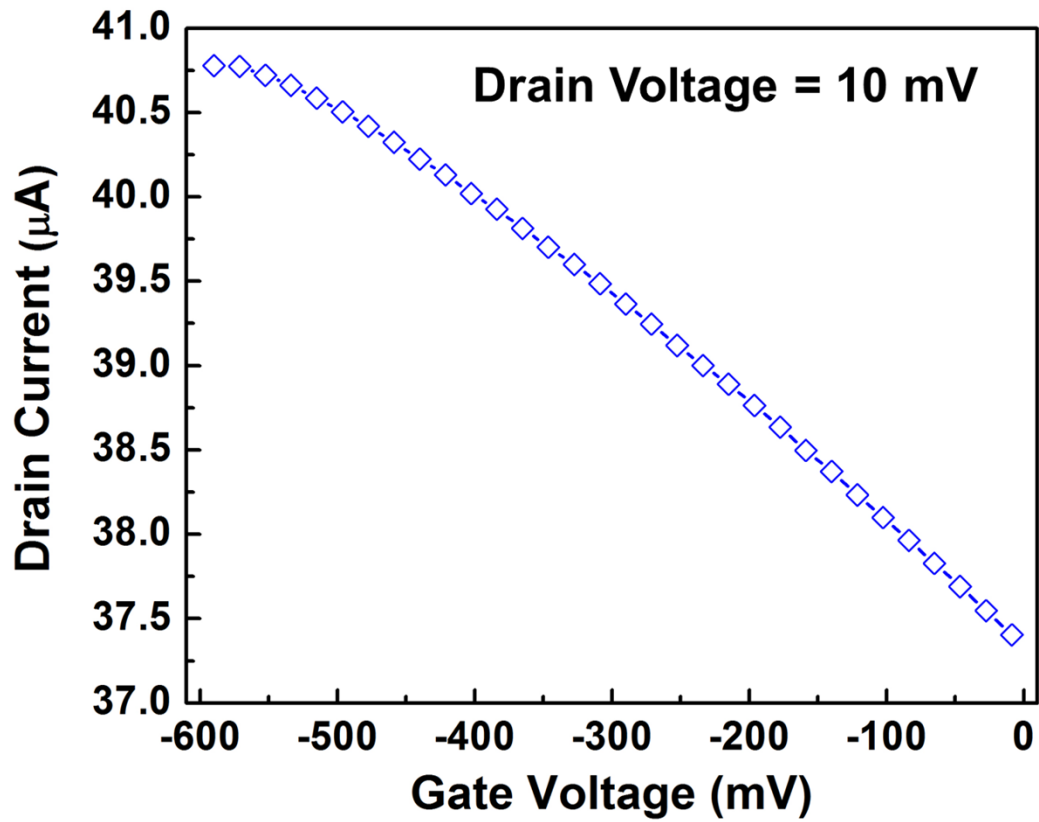

(b)

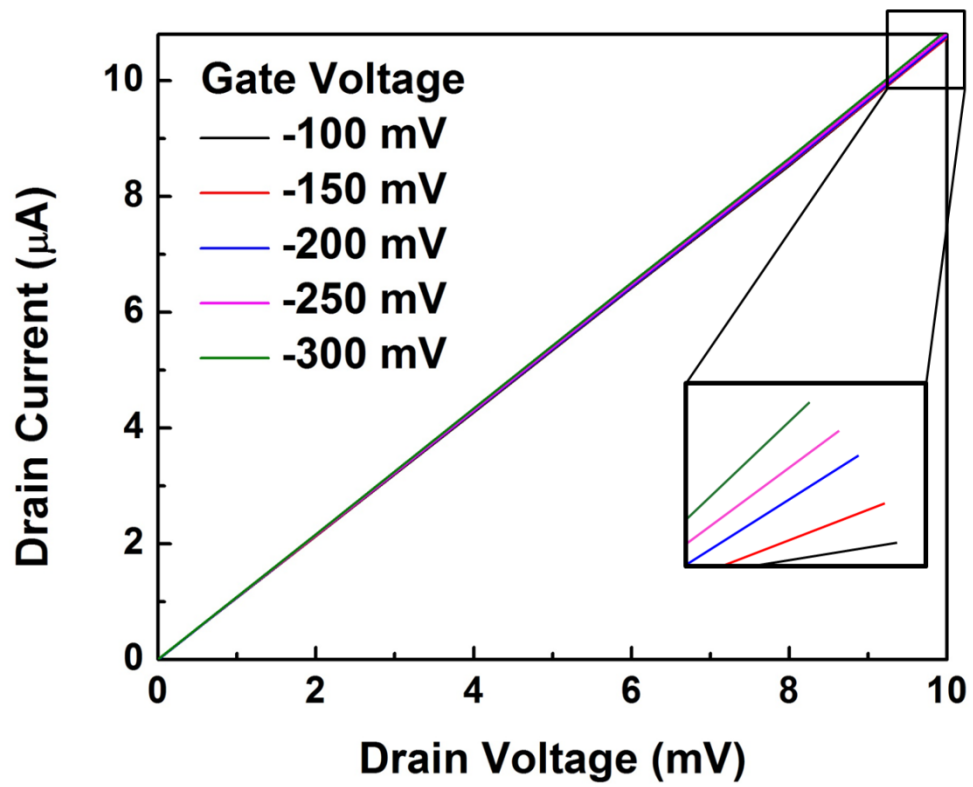

Figure S1. (a)  $I_d$  vs.  $V_g$  at a fixed  $V_d$  (10 mV); (b)  $I_d$  vs.  $V_d$  at different gate voltages (ranging from - 100 mV to - 300 mV).
